# Supplementary material for: Research Associates Program: Expanding clinical research productivity with undergraduate students
Source: PubMed Central journal article supplement — SAGE Open Med. 2017 Sep 11;5:2050312117730245. doi: 10.1177/2050312117730245 (PMC5598797; doi:10.1177/2050312117730245), 2017-09-11
Supplement: Emergency_Medicine_Research_Associates.pdf [file Emergency_Medicine_Research_Associates.pdf]

## **Emergency Medicine Research Associates Program Academic Curriculum**

### **Vision**

The most prestigious undergraduate research associates program in the methodology and skills of clinical and epidemiological research in the United States.

### **Mission**

The undergraduate research associates will become experienced in studying, interpreting, designing and conducting clinical research. The program mission will be accomplished through a series of lectures presented by faculty speakers in addition to independent and team-based assignments.

### **Curriculum Goals**

1. Educate and train undergraduate research associates to organize, understand, and present clinical research.
2. Introduce research associates to allied healthcare professions and integrate career development.

### **Curriculum Objectives**

Upon completion of academic program, the research associate will be able to:

1. Generate a hypothesis and study design
2. Conduct a literature review for study design and manuscript preparation
3. Understand the basics of clinical epidemiology and biostatistics
4. Understand how the Institutional Review Board (IRB) operates and how to submit new clinical studies
5. Compose a research grant proposal
6. Effectively summarize and present a scientific article
7. Successfully perform the methodology required for clinical research
8. Produce a full scientific manuscript in publication format

## Curriculum Schedule

| Session/ Quarter | Goal                                                                                                                                                                                    |
|------------------|-----------------------------------------------------------------------------------------------------------------------------------------------------------------------------------------|
| Summer           | Design clinical research study that meets criteria of being feasible, interesting, novel, ethical, and relevant                                                                         |
| Fall             | Submit a research grant proposal to the UC Irvine Undergraduate Research Opportunities Program (UROP) to receive funding for their respective studies                                   |
| Winter           | Publish their study through a successful manuscript submission to the UC Irvine School of Biological Sciences Excellence in Research Program                                            |
| Spring           | Present research at the UC Irvine Undergraduate Research Opportunities Program Symposium, UC Irvine Excellence in Research Conference and/or regional and national scientific meetings. |

## Faculty Speaker Series

| Lecturer                                                                                                                                                                | Lecture Topic                                       | Outcome/Goal                                                                                                                                                                          |
|-------------------------------------------------------------------------------------------------------------------------------------------------------------------------|-----------------------------------------------------|---------------------------------------------------------------------------------------------------------------------------------------------------------------------------------------|
| Bharath Chakravarthy, MD, MPH<br>Director of Emergency Medicine Residency Program<br>Associate Professor of Clinical Emergency Medicine<br>UC Irvine School of Medicine | Designing Clinical Research                         | Research associates will be able to design a clinical research study that meets criteria of being feasible, interesting, novel, ethical, and relevant                                 |
| Linda Murphy<br>UC Irvine Librarian                                                                                                                                     | Strategies for Literature Research                  | Research associates will be able to navigate scientific databases to conduct literature reviews and gather information on previous scientific studies                                 |
| Eric McCoy, MD, MPH<br>Director of Simulation Education<br>Assistant Clinical Professor of Emergency Medicine<br>UC Irvine School of Medicine                           | Introduction to Clinical Epidemiology               | Research associates will be able to understand and interpret clinical research papers and their relevance to the medical field and broader society                                    |
| Jeffrey Suchard, MD<br>Director of Toxicology<br>Professor of Clinical Emergency Medicine<br>UC Irvine School of Medicine                                               | Institutional Review Board                          | Research associates will be able to understand the IRB Protocol Narrative review and approval process                                                                                 |
| Said Shokair<br>Director of UC Irvine Undergraduate Research Associates Program                                                                                         | Undergraduate Research Opportunities Program (UROP) | Research associates will learn about the various opportunities UROP offers for students to apply for grant funding and present their research findings                                |
| J. Christian Fox, MD<br>Associate Dean of Student Affairs<br>Professor of Clinical Emergency Medicine<br>UC Irvine School of Medicine                                   | Specialty Career Perspectives                       | Research associates will learn about the residency application process, the various medical specialties, and tools available to assist with successful career path decisions via AAMC |
| Ellena Peterson, PhD<br>Associate Dean of Admissions and Outreach<br>Professor of Pathology                                                                             | Medical School Admissions Process                   | Research associates will learn about the steps required to successfully apply to medical school and                                                                                   |

|                                                                                                                                               |                                                                                  |                                                                                                                                                                                                                                                                                                                                      |
|-----------------------------------------------------------------------------------------------------------------------------------------------|----------------------------------------------------------------------------------|--------------------------------------------------------------------------------------------------------------------------------------------------------------------------------------------------------------------------------------------------------------------------------------------------------------------------------------|
| UC Irvine School of Medicine                                                                                                                  |                                                                                  | ultimately pursue training as a medical professional                                                                                                                                                                                                                                                                                 |
| Craig Anderson, PhD, MPH<br>Research Director of the UC Irvine Center for Trauma and Injury Prevention Research                               | Statistics in Research                                                           | Part I: Research associates will learn about basic statistical methods and values that are essential to understanding results of clinical research studies<br><br>Part II: Research associates will learn the importance of proper data presentation by graphs and tables in order to effectively communicate research study results |
| Susan Schafer<br>Coordinator of UC Irvine School of Biological Sciences Excellence in Research Program                                        | UC Irvine School of Biological Sciences Excellence in Research Presentation      | Research associates will learn the necessary steps and requirements for participation in the Excellence in Research program, involving successful manuscript writing and oral/poster presentation                                                                                                                                    |
| Shadi Lahham, MD<br>Resident of Emergency Medicine<br>University of Nevada, Las Vegas<br>Alumni of UC Irvine EMRAP                            | Medical School Admissions Process: Through the Eyes of a Medical School Graduate | Research associates will gain a thorough understanding of the components of a successful medical school application from a medical school student interviewer                                                                                                                                                                        |
| Jeffrey Suchard, MD<br>Director of Toxicology<br>Professor of Clinical Emergency Medicine<br>UC Irvine School of Medicine                     | How to Give an Effective Oral Presentation using Microsoft PowerPoint            | Research associates will learn how to give an effective PowerPoint presentation at scientific research meeting and symposiums                                                                                                                                                                                                        |
| Mark Langdorf, MD, MHPE<br>Department Chair of Emergency Medicine<br>Professor of Clinical Emergency Medicine<br>UC Irvine School of Medicine | How to Give an Effective Poster Presentation                                     | Research associates will learn how to design and deliver an effective poster presentation of their research at scientific research meetings and symposiums                                                                                                                                                                           |
| Megan Boysen Osborn, MD<br>Associate Director of                                                                                              | How to Compose an Effective Curriculum Vitae                                     | Research associates will learn how to develop and                                                                                                                                                                                                                                                                                    |

|                                                                                                                                  |      |                                                       |
|----------------------------------------------------------------------------------------------------------------------------------|------|-------------------------------------------------------|
| Emergency Medicine<br>Residency Program<br>Assistant Professor of<br>Clinical Emergency Medicine<br>UC Irvine School of Medicine | (CV) | organize a CV for use among<br>professional academia. |
|----------------------------------------------------------------------------------------------------------------------------------|------|-------------------------------------------------------|

## Academic Assignments

| Assignment                     | Task                                                                                                                                                                                                                                                                                                 | Goal                                                                                                                                                                                                 |
|--------------------------------|------------------------------------------------------------------------------------------------------------------------------------------------------------------------------------------------------------------------------------------------------------------------------------------------------|------------------------------------------------------------------------------------------------------------------------------------------------------------------------------------------------------|
| Literature Review              | <p>Research 5 clinical studies that are relevant to the topic assigned to each group and summarize the following for each study:</p> <ol style="list-style-type: none"> <li>1. Goal/Hypothesis</li> <li>2. Study Population</li> <li>3. Methods</li> <li>4. Results</li> <li>5. Relevance</li> </ol> | <p>Upon completion, research associates will be able to: understand how studies are designed, how to navigate scientific databases, and be able to interpret the importance of specific studies.</p> |
| Grant Proposal Writing         | <p>Liaisons for their particular study are required to develop a Grant Proposal that will be submitted to the UCI Undergraduate Research Opportunity Program (UROP)</p>                                                                                                                              | <p>Upon completion, research associates will be have the opportunity to receive funding for their study as well as develop grant writing skills</p>                                                  |
| Manuscript Writing             | <p>Excellence in Research Paper:</p> <ol style="list-style-type: none"> <li>1. Abstract</li> <li>2. Introduction</li> <li>3. Material and Methods</li> <li>4. Results</li> <li>5. Discussion</li> </ol>                                                                                              | <p>Upon completion, research associates will have completed a draft of their Excellence in Research manuscript. They will then receive feedback and submit their paper to the online journal.</p>    |
| Clinical Research Study Design | <p>Review Academic program lectures before researching and designing a novel clinical research question and presenting to peers</p>                                                                                                                                                                  | <p>Upon completion, research associates will be able to design a clinical research study that meets criteria of being feasible, interesting, novel, ethical, and relevant</p>                        |

## Program Outcomes and Student Accomplishments

### UC Irvine Undergraduate Research Opportunities Program (UROP) Grant Awards and Symposium Presentations

The Undergraduate Research Opportunities Program (UROP) encourages and facilitates research by undergraduates from all schools and academic disciplines at UCI. UROP offers assistance to students and faculty through all phases of the research process, whether it is with proposal writing, developing research plans through project management skills, awarding grants to fund research projects, scholarly journal writing through The UCI Undergraduate Research Journal, or presenting results of the research or creative project through the UCI Undergraduate Research Symposium. This experience provides students with the necessary skills to succeed in their future careers.

| Student Participants                                           | Poster/Presentation Title                                                                                                                                      | Grant Award |
|----------------------------------------------------------------|----------------------------------------------------------------------------------------------------------------------------------------------------------------|-------------|
| Nadia Zuabi, Nooreen Khan, Chelsey Bithell, and Armaan Rowther | Prevalence and Clinical Import of Thoracic Injuries Identified by Chest CT but not Chest Radiograph in Blunt Trauma Patients                                   | \$900       |
| Vincent Lam                                                    | Bedside Ultrasound vs. Chest X-Ray in the Evaluation of Placement of Central Venous Catheters                                                                  | \$500       |
| Helena and Hinal                                               | Randomized Assessment of Alcohol Consumptions with Computerized Screening and Brief Intervention for Adult and Adolescent Patients in the Emergency Department | \$400       |
| Fareed Ahmed                                                   | Validation of the NEXUS-II Decision Tool in Blunt Head Injury Patients Presenting to a Level 1 Trauma Center                                                   | \$300       |
| Aspen Alotis, Chris Gilani, and Allen Yang                     | Emergency Department versus Radiology Department pelvic Ultrasound and Effect on Patient Length of Stay: A Randomized Control Trial                            | \$300       |
| Sohni Singh and Chris Gilani                                   | Utility of Ultrasound Guided Lumbar Puncture in Successfully Reducing Level of Traumatic Taps                                                                  | \$300       |
| Sohni Singh and Trang Tran                                     | Attending Level Abdominal                                                                                                                                      | \$300       |

|                  |                                                                                                                                                              |                      |
|------------------|--------------------------------------------------------------------------------------------------------------------------------------------------------------|----------------------|
|                  | Physical Exam vs. Medical Student Abdominal Ultrasound Exam                                                                                                  |                      |
| Anthony Khong    | Are Ultrasonographically Obtained Common Bile Duct Measurements in Emergency Department Patients with Symptomatic Gallstones Useful?                         | \$300                |
| Kevin Pham       | The Natural History of Human Stingray Injuries                                                                                                               | \$250                |
| Samantha Wong    | Evaluation of Shoulder Injury in the Emergency Department: Utility of Bedside Ultrasound in the Diagnosis of Acute Shoulder Dislocation                      | Honorary Recognition |
| Anum Iqbal       | Does a Consensus Exist between Emergency Physicians Regarding Physical Characteristics that Constitute a Seatbelt Sign?                                      | Honorary Recognition |
| Patrick Penalosa | Are Immobilization Backboards and C-Collars Needed for Patients who are Ambulatory at the Scene of a Motor Vehicle Accident? The Occurrence of Spinal Injury | N/A                  |
| Alex Trinh       | Physician and Patient Vies on Acceptable Risk for CT in Trauma                                                                                               | N/A                  |

## Excellence in Research

The UCI School of Biological Science offers students enrolled in Undergraduate Research the opportunity to present their scientific data to the academic community at the Undergraduate Research Symposium by participating in the Excellence in Research Program. Those students who successfully complete the program are rewarded with Excellence in Research in Biological Sciences and have their research papers published in the school journal.

| Title of Published Papers | Author |
|---------------------------|--------|
|---------------------------|--------|



|                                                                                                                                                      |                 |
|------------------------------------------------------------------------------------------------------------------------------------------------------|-----------------|
| Does a consensus exist between emergency physicians regarding physical characteristics that constitute a seatbelt sign?                              | Anum Iqbal      |
| Prevalence and clinical import of thoracic injuries identified by computed tomography but not chest radiography in blunt trauma patients             | Chelsey Bithell |
| Validation of the Nexus-II decision tool in blunt head injury patients presenting to a level I trauma center                                         | Fareed Ahmed    |
| The natural history of human stingray injuries                                                                                                       | Kevin Pham      |
| Utility of ultrasound guided lumbar puncture in successfully reducing level of traumatic taps                                                        | Sohni Signh     |
| Three window ultrasound for confirmation of endotracheal tube placement                                                                              | Trang Tran      |
| California prescription drug monitoring system (CURES) and its effect on physician prescribing behavior among patients presenting with chronic pain. | Vincent Chang   |

### 2013 Pathways to Cures: Clinical Translational Research Day at UCI

UC Irvine Institute for Clinical and Translational Sciences (ICTS) is committed to transforming ideas into medical reality and to accelerate the discovery of new treatments across the spectrum of human disease/injury. UC Irvine Emergency Medicine research associates presented their research findings at the 2013 annual symposium of translational clinical science.

| Poster Title                                                                                                                         | Authors                       |
|--------------------------------------------------------------------------------------------------------------------------------------|-------------------------------|
| Randomized Assessment of Alcohol Consumption with Computerized Alcohol Screening and Brief Intervention for Adult Emergency Patients | Helena Do and Hinal Patel     |
| Are Ultrasonographically obtained common bile duct measurements in Emergency Department Patients with Symptomatic Gallstones Useful? | Anthony Khong                 |
| Emergency Department vs. Radiology Department Pelvic Ultrasound and Effect on Patient Length of Stay: A Randomized                   | Aspen Alotis and Chris Gilani |

|                                                                                                                             |                                                                |
|-----------------------------------------------------------------------------------------------------------------------------|----------------------------------------------------------------|
| Control Trial                                                                                                               |                                                                |
| Prevalence and Clinical Impacts of Thoracic Injury Identified by Chest CT But Not Chest Radiograph in Blunt Trauma Patients | Nadia Zuabi, Nooreen Khan, Chelsey Bithell, and Armaan Rowther |
| Success of Lumbar Puncture After Using Ultrasound to Identify Landmarks                                                     | Chris Gilani and Sohni Singh                                   |
| Three Window Bedside Ultrasound vs. Chest X-ray for Confirmation of Endotracheal Tube Placement                             | Trang Tran                                                     |
| Yield and Clinical Predictors of Thoracic Spine Injury from Chest Computed Tomography for Blunt Trauma                      | Patrick Penalosa                                               |
